# Supplementary material for: Reversible control of post-Golgi transport by brefeldin A reveals recycling endosome maturation during glycosylphosphatidylinositol-anchored protein transport
Source: Research Square preprint supplement (doi:10.21203/rs.3.rs-8241134/v1), 2025-12-10
Supplement: Supplementary file 1 [file f165c7d92205e657a2e3ae9d.xlsx]

## Sheet: Plasmids
plasmid_name		CMV-2xRuby-GM130	CMV-ManII-EGFP	CT7-2xSca-mBIG1	CT7-2xNG-Rab11a	CT7-2xCv-mBIG2	CT7-2xtB2-Vamp3	CT7-2xSca-Rab11a	CMV-2xtB2-Rab6a	CMV-2xCv-Rab6a	CT7-2xSca-Rab6a	CT7-2xTq-GM130	CT7-mARF1-LL-2xSca	CT7-mARF3-ML-2xSca	CT7-mARF1-LL-2xNG	CT7-mARF4-2xNG	CT7-mARF5-2NG	CT7-mARF1-LL-2xtB2	CT7-mARF3-ML-2xtB2	CMV-2xNG-Clc	CT7-mAP1m1-2xSca	CT7-mAP1m1-2xNG	CT7-mAP1m1-HT7	CT7-Sec13-2xSca	CMV-TNF-zdk-HT	CMV-SP-zdk-2xNG-GPI	Str-KDEL_SBP-2xNG-GPI	Str-KDEL_SBP-2xNG-VSVG	Str-KDEL_SBP-TNF-2xNG	Str-KDEL_SBP-2xSca-VSVG	CT7-RUSH-2xSca-M6PR	Str-KDEL_SBP-GFP-AX2-GPI	CT7-RUSH-HT7-GPI	CT7-Rush-2xSca-GPI	CMV-TfR-2xSca	CT7-HA-LL-NBgA-2xtB2	CT7-HA-ML-NBgA-2xtB2	CT7-RUSH-2xSca-GPI	CMV-TNF-SBP-2NG	CMV-TNF-zdk-2NG	CT7-HA-NBgA-2xNG	CT7-HA-NBgA-2xSca	CMV-SP-SBP-2xSca-GPI	CMV-SP-SBP-GFP-AX2-GPI	CT7-2xNG-NBgAm	CMV-SP-SBP-HT7-GPI	CT7-HA-HT7-m	CT7-HA-NBgA-m	CMV-SP-SBP-GFP-AX2-m
marker_name_in_figure		Rb::GM130	ManII::EGFP	Sca::BIG1	NG::Rab11a	Cv::BIG2	tgB::Vamp3	Sca::Rab11a	tagBFP::Rab6a	Cv::Rab6a	Sca::Rab6a	Tq::GM130	ARF1::Sca	ARF3::NG	ARF1::NG	ARF4::NG	ARF5::NG	ARF1::tB2	ARF3::tB2	NG::Clc	AP1M1::Sca	AP1M1::NG	AP1M1::HT	Sec13::Sca	TNFα::HT	NG::GPI	NG::GPI	NG::VSVG	TNFα::NG	Sca::VSVG	Sca::M6PR	APEX2::GPI	HT::GPI	Sca::GPI	TfR::Sca
reference		Tago et al	Tago et al	This work	This work	This work	This work	This work	This work	This work	Tago et al	This work	This work	This work	This work	This work	This work	This work	This work	This work	This work	This work	This work	This work	Bioprotocol	Tago et al	This work	Tago et al	This work	This work	This work	This work	This work	This work	Tago et al	This work	This work	This work	This work	This work	This work	This work	This work	This work	This work	This work	This work	This work	This work
ref_URL		https://doi.org/10.1038/s44319-024-00342-z	https://doi.org/10.1038/s44319-024-00342-z								https://doi.org/10.1038/s44319-024-00342-z														https://doi.org/10.21769/bioprotoc.5468	https://doi.org/10.1038/s44319-024-00342-z		https://doi.org/10.1038/s44319-024-00342-z							https://doi.org/10.1038/s44319-024-00342-z
Cloning marker		kan	kan	kan	kan	kan	kan	kan	kan	kan	kan	kan	kan	kan	kan	kan	kan	kan	kan	kan	kan	kan	kan	kan	kan	kan	amp	amp	amp	amp	kan	amp	kan	kan	kan
Visible marker		2x mRuby3	EGFP	2x mScarlet-I	2x mNeonGreen	2x mClover3	2x mTagBFP2	2x mScarlet-I	2x mTagBFP2	2x mClover3	2x mScarlet-I	2x mTourqoise2	2x mScarlet-I	2x mNeonGreen	2x mNeonGreen	2x mNeonGreen	2x mNeonGreen	2x mTagBFP2	2x mTagBFP2	2x mNeonGreen	2x mScarlet-I	2x mNeonGreen	Halo7	2x mScarlet-I	Halo7	2x mNeonGreen	2x mNeonGreen	2x mNeonGreen	2x mNeonGreen	2x mScarlet-I	2x mScarlet-I	EGFP	Halo7	2x mScarlet-I	2x mScarlet-I
		N-terminal	N-terminal	N-terminal	N-terminal	N-terminal	N-terminal	N-terminal	N-terminal	N-terminal	N-terminal	N-terminal	C-terminal	C-terminal	C-terminal	C-terminal	C-terminal	C-terminal	C-terminal	N-terminal	C-terminal	C-terminal	C-terminal	C-terminal	C-terminal	N-terminal	N-terminal	N-terminal	C-terminal	N-terminal	N-terminal	N-terminal	C-terminal	N-terminal	C-terminal
Backbone	plasmid_name			CT7-2xSca-NBgAm	CT7-2xNG-NBgAm	CT7-2xCv-NBgAm	CT7-2xtB2-NBgAm	CT7-2xSca-NBgAm	CT7-2xtB2-NBgAm	CT7-2xCv-NBgAm		CT7-2xTq-NBgAm	CT7-mARF1-LL-2xtB2	CT7-mARF3-ML-2xtB2	CT7-mARF1-LL-2xtB2	CT7-HA-NBgA-2xNG	CT7-HA-NBgA-2xNG	CT7-HA-LL-NBgA-2xtB2	CT7-HA-ML-NBgA-2xtB2	CT7-2xNG-NBgAm	CT7-mAP1m1-2xNG	CT7-HA-NBgA-2xNG	CT7-mAP1m1-2xNG	CT7-HA-NBgA-2xSca			Str-KDEL_SBP-2xNG-VSVG		Str-KDEL_SBP-EGFP-GPI	CT7-RUSH-2xSca-GPI	CT7-RUSH-2xSca-GPI	Str-KDEL_SBP-EGFP-GPI	CT7-RUSH-2xSca-GPI	Str-KDEL_SBP-EGFP-GPI		CT7-HA-NBgA-2tB2	CT7-HA-NBgA-2tB2	CT7-HA-NBgA-m	CMV-TNF-zdk-2NG	CMV-TNF-zdk-2Sca	CT7-HA-NBgA-m	CT7-HA-NBgA-m	CMV-SP-SBP-GFP-AX2-GPI	CMV-SP-SBP-GFP-AX2-m		CMV-SP-SBP-2NG-GPI
	reference												This work	This work	This work	This work	This work	This work	This work	This work	This work	This work	This work	This work			Tago			This work	This work		This work			This work	This work	This work	This work	Tago	This work	This work	This work	This work		This work
	ref_URL																												https://www.addgene.org/65294/			https://www.addgene.org/65294/		https://www.addgene.org/65294/
construction method				Gibson Asemmbly	Ligation	Ligation	Ligation	Ligation	Ligation	Ligation	Ligation	Ligation	Ligation	Ligation	Ligation	Gibson Asemmbly	Gibson Asemmbly	Gibson Asemmbly	Ligation	Ligation	Ligation	Gibson Asemmbly	Ligation	Ligation			Gibson Asemmbly	Ligation	Gibson Asemmbly	Ligation	Ligation	Ligation	Ligation	Ligation		Ligation		Gibson Asemmbly	Gibson Asemmbly	Ligation			Ligation	Gibson Asemmbly		Ligation			Gibson Asemmbly
	cloning_sites			XhoI, MluI	XhoI, ApaI	XhoI, XbaI	XhoI, ApaI	XhoI, ApaI	XhoI, ApaI	XhoI, ApaI	XhoI, ApaI	NotI, ApaI	XhoI, ApaI	XhoI, ApaI	XhoI, ApaI	KpnI, SpeI	KpnI, SpeI	KpnI, SpeI	KpnI, SpeI	XhoI, ApaI	XhoI, ApaI	KpnI, SpeI	XhoI, ApaI	KpnI, SpeI			XhoI, ApaI	XhoI, ApaI	AscI, XbaI	XhoI, ApaI	XhoI, ApaI	EcoRI, XbaI	BamHI, XbaI	EcoRI, XbaI		SpeI, NotI	NotI, BglII	BamHI, MluI	AscI, BamHI	XhoI, ApaI			KpnI, XhoI	XhoI, ApaI		KpnI, SpeI			NheI, MluI
Insert_1	source			mouse cDNA	tdTomato-Rab11a-7	mouse cDNA	pEGFP VAMP3	tdTomato-Rab11a-7	HeLa cDNA	CMV-2xtB2-Rab6a	CMV-2xtB2-Rab6a	CMV-2xRuby-GM130	CT7-HA-NBgA-2xSca	CT7-HA-NBgA-2xSca	CT7-HA-NBgA-2xNG	mouse cDNA	mouse cDNA	mouse cDNA	mouse cDNA	CLC-pmCherryC1	CT7-HA-NBgA-2xSca	mouse cDNA	CT7-HA-HT7-m	HeLa cDNA			Str-KDEL_SBP-EGFP-GPI	Str-Ii_VSVG-SBP-EGFP	CMV-TNF-SBP-2NG	Str-KDEL_SBP-2xNG-VSVG	HeLa cDNA	CMV-SP-SBP-GFP-AX2-GPI	CMV-SP-SBP-HT7-GPI	CMV-SP-SBP-2xSca-GPI		CT7-HA-LL-Tb-2Cv	Synthetic (anealed)	Str-KDEL_SBP-2xSca-GPI	Str-KDEL_SBP-EGFP-GPI	CT7-HA-NBgA-2xNG			CT7-2xSca-NBgA-m	Str-KDEL_SBP-EGFP-GPI		CT7-HA-HT7-m			pMT-SP-SBP-GFP-AX2m
	source_URL				https://www.addgene.org/58128/		https://www.addgene.org/42310/	https://www.addgene.org/58128/		This work	This work	Tago	This work	This work	This work					https://www.addgene.org/27680/	This work	This work	This work				https://www.addgene.org/65294/	https://www.addgene.org/65300/	This work	This work		This work	This work			BME		This work	https://www.addgene.org/65294/	This work			Tago	https://www.addgene.org/65294/		This work			This work
	primer1_name			Xh-GL4-mBIG1	Xh-Rab11a	Xh-mBIG2	Xh-Vamp3	Xh-Rab11a	Xh-Rab6a							K-CT7-mARF4	K-CT7-mARF5	K-CT7-mARF1	K-mARF3	Xh-Clc		K-CT7-mAP1m1	Xh-Halo	K-hSec13			GL4-Xh-GPI	Xh-VSVG	Asc-IRES-CMT		Xh-M6PR						N-ML-NBg-1	dB-CT7-Rush	GL4-SBP					GL4-Xh-GPI		K-Halo			Nh-CMV-ILSP
	primer1_sequence			GAGGTTCTGGTggcggtGGCTCGAGTTATGAGGGCAAGAAGACGAAGAACA	cctCTCGAGTATGGGCACCCGCGACGACG	GGCTCGAGTggtCAGGAAAGCCAGACCAAGAGCA	ggctcgagtATGTCTACAGGTCCAACTGCTGC	cctCTCGAGTATGGGCACCCGCGACGACG	GGCTCGAGTATGTCCACGGGCGGAGACTTCG							CTATAGGGGATCCggGGTACCaccATGGGCCTCACCATCTCCT	CTCACTATAGGGGATCCggGGTACCgccatgggcctcacggt	CTATAGGGGATCCggGGTACCATGGGGAATATCTTTGCAAACCTCT	ggtggtaccATGGGCAATATCTTTGGRAACCTTC	ccCTCGAGtggtATGGCCGAGTTGGATCCATTC		CTATAGGGGATCCggGGTAccATGTCCGCCAGCGCCGTCTA	GGCTCGAGTggtgggATGGCAGAAATCGGTACTGG	GGTGGTACCATGGTGTCAGTAATTAACACTGTGGA			GAGGTTCTGGTggcggtGGCTCGAGTCTGGAAAATGGCGGAACCTCTCTG	GGCTCGAGTAAGTTCACCATAGTTTTTCCACACAAC	GCTTGCCACAACccgggaGGcgcgCCAGATCCGGGGATCTAGATCGGGGTAC		GGCTCGAGTggtACAGAAGAAAAAACTTGCGACTTGGTA						GGCCGGTTCTGGAAGTGGATCTggaggtggcgggAGTggaggaGCGGCCGCtggtggtA	CCTAATACGACTCACTATAGGGCTTGGTACCGAGCTCGGATCGA	GGTGGAGGTTCTGGTggcggtGGCTCCGACGAGAAGACCACTGGT					GAGGTTCTGGTggcggtGGCTCGAGTCTGGAAAATGGCGGAACCTCTCTG		GGTGGTACCATGGCAGAAATCGGTACTGGCTT			ttagtgaaccgtcagatccgctagccgccATGTACAGGATGCAACTCC
	primer2_name			mBIG1-MT-Mlu	Rab11a-Ap	mBIG2-Xa	Vamp3-Ap	Rab11a-Ap	Rab6a-Ap							mARF4-GL3-Sp	mARF5-GL3-Sp	mARF1-CT7-Sp	mARF3-Sp	Clc-Ap		mAP1m1-CT7-Sp	Halo-Ap-Mlu-Xa	hSec13-Sp			GPI-MT-Ap	VSVG-Ap	MT-RUSH-Xa		M6PR-Ap						N-ML-NBg-2	MT-Mlu-Short	SBP-GSGS					GPI-MT-Ap		Halo-Sp			MT-Mlu-Xa-CMV-N
	primer2_sequence			AGATGGTGATGATGaccggtacgCGTTCATTGCCTGTTTATCCCAAGTTCCT	gggtgggcCCTTAGATGTTCTGACAGCACTGCA	ccTCTAGAccagtgCTACCAGGTCGATGACAG	ggagggcccTCATGAAGAGACAACCCACACGA	gggtgggcCCTTAGATGTTCTGACAGCACTGCA	ggagggcccTTAGCAGGAACAGCCTCCTTCAC							CACCAGAACCTCCTCCTCCACTAGTaccACGTTTTGAAAGTTCATTTGACAGC	CACCAGAACCTCCTCCTCCACTAGTaccgcgctttgacagctcg	CCAGAACCTCCTCCTCCACTAGTaccCTTCTGGTTCCGGAGCTGATTAG	ccACTAGTtccCTTCTTGTTTTTGAGCTGATTGGCCA	ggagggccctaccTCAGTGCACCAGGGG		CCACCAGAACCTCCTCCTCCACTAGTaccctgggtccggagctgataatc	cctctagacgcgtgggcccTTAGCCGGAAATTTCGAGCGTC	ccactagtCTGCTCGTTCTGCTGGCCCTC			ggcttaccttcgaagggcCCTCATGGGTGGAGGGACCAA	ggtGGGCCCTCACTTTCCAAGTCGGTTCATCTCTATGT	TGGCTGATTATGATCAGTTATCTAGATGGTGATGATGACCGGTAC		ggtgggcccCTACATTGGTAATAAATGGTCATCCCT						GATCTaccaccaGCGGCCGCtcctccACTcccgccacctccAGATCCACTTCCAGAACC	GATGGTGATGATGaccggtacgCG	accagaaccagaaccaccggatccTGGTTCACGTTGACCTTGTGGG					ggcttaccttcgaagggcCCTCATGGGTGGAGGGACCAA		cccACTAGTACCGCCGGAAATTTCGAGCGTC			TGATTATGATCTAGAGTCGCTCTAGATGGTGATGATGaccggtacgC
Insert_2	source
	source_URL
	primer1_name
	primer1_sequence
	primer2_name
	primer2_sequence
GenBank fromat		LOCUS New_DNA 7802 bp DNA circular 22-OCT-2023 DEFINITION LAMP1-mGFP Sequencing Result ORGANISM other sequences; artificial sequences; vectors. COMMENT CMV-2xCv-GM130 from 1 to 7775 COMMENT CMV-mAX2m from 1 to 4915 COMMENT LAMP1_mGFP(34831) from 1 to 6015 COMMENT ApEinfo:methylated:1 FEATURES Location/Qualifiers promoter 17..569 /locus_tag="CMV_immearly_promoter" /label="CMV_immearly_promoter" /A…	LOCUS CMV_ManII_EGFP 5048 bp ds-DNA circular 27-FEB-2020 DEFINITION LAMP1-mGFP Sequencing Result ORGANISM other sequences; artificial sequences; vectors. COMMENT CMV-ST-EGFP from 1 to 4850 COMMENT LAMP1_mGFP(34831) from 1 to 6015 COMMENT ApEinfo:methylated:1 FEATURES Location/Qualifiers promoter 17..569 /label=CMV_immearly_promoter /ApEinfo_fwdcolor=#ccffed /ApEinfo_revcolor=#ccffed /ApEinfo_grap…	LOCUS CT7_2xSca_mBIG1 11078 bp DNA circular 25-MAR-2022 DEFINITION LAMP1-mGFP Sequencing Result ORGANISM other sequences; artificial sequences; vectors. COMMENT CT7-HA-NBgAm from 1 to 4235 COMMENT CMV-HA-NBgAm-Xa from 1 to 4184 COMMENT CMV-mAX2m from 1 to 4915 COMMENT LAMP1_mGFP(34831) from 1 to 6015 COMMENT ApEinfo:methylated:1 FEATURES Location/Qualifiers misc_feature 72..359 /locus_tag="CAG_en…	LOCUS CT7_2Sca_Rab11a 5639 bp DNA circular 30-OCT-2025 DEFINITION LAMP1-mGFP Sequencing Result ORGANISM other sequences; artificial sequences; vectors. COMMENT CT7-2xSca-mBIG1 from 1 to 11078 COMMENT CT7-HA-NBgAm from 1 to 4235 COMMENT CMV-HA-NBgAm-Xa from 1 to 4184 COMMENT CMV-mAX2m from 1 to 4915 COMMENT LAMP1_mGFP(34831) from 1 to 6015 COMMENT ApEinfo:methylated:1 FEATURES Location/Qualifiers …	LOCUS CT7_2xCV_mBIG2 10938 bp DNA circular 25-MAR-2022 DEFINITION LAMP1-mGFP Sequencing Result ORGANISM other sequences; artificial sequences; vectors. COMMENT CT7-HA-NBgAm from 1 to 4235 COMMENT CMV-HA-NBgAm-Xa from 1 to 4184 COMMENT CMV-mAX2m from 1 to 4915 COMMENT LAMP1_mGFP(34831) from 1 to 6015 COMMENT ApEinfo:methylated:1 FEATURES Location/Qualifiers misc_feature 72..359 /locus_tag="CAG_enh…	LOCUS CT7_2Cv_hVamp3 5933 bp DNA circular 30-OCT-2025 DEFINITION LAMP1-mGFP Sequencing Result ORGANISM other sequences; artificial sequences; vectors. COMMENT CT7-HA-NBgAm from 1 to 4235 COMMENT CMV-HA-NBgAm-Xa from 1 to 4184 COMMENT CMV-mAX2m from 1 to 4915 COMMENT LAMP1_mGFP(34831) from 1 to 6015 COMMENT ApEinfo:methylated:1 FEATURES Location/Qualifiers misc_feature 161..448 /locus_tag="CAG_enh…	LOCUS CT7_2Sca_Rab6a 6242 bp DNA circular 30-OCT-2025 DEFINITION LAMP1-mGFP Sequencing Result ORGANISM other sequences; artificial sequences; vectors. COMMENT CT7-2xSca-mBIG1 from 1 to 11078 COMMENT CT7-HA-NBgAm from 1 to 4235 COMMENT CMV-HA-NBgAm-Xa from 1 to 4184 COMMENT CMV-mAX2m from 1 to 4915 COMMENT LAMP1_mGFP(34831) from 1 to 6015 COMMENT ApEinfo:methylated:1 FEATURES Location/Qualifiers m…	LOCUS CT7_2xtB2_Rab6a 6239 bp DNA circular 11-JUN-2025 DEFINITION LAMP1-mGFP Sequencing Result ORGANISM other sequences; artificial sequences; vectors. COMMENT CT7-2xSca-mBIG1 from 1 to 11078 COMMENT CT7-HA-NBgAm from 1 to 4235 COMMENT CMV-HA-NBgAm-Xa from 1 to 4184 COMMENT CMV-mAX2m from 1 to 4915 COMMENT LAMP1_mGFP(34831) from 1 to 6015 COMMENT ApEinfo:methylated:1 FEATURES Location/Qualifiers …	LOCUS CMV_2xtB2_Rab6a 6245 bp DNA circular 30-OCT-2025 DEFINITION LAMP1-mGFP Sequencing Result ORGANISM other sequences; artificial sequences; vectors. COMMENT CT7-2xSca-mBIG1 from 1 to 11078 COMMENT CT7-HA-NBgAm from 1 to 4235 COMMENT CMV-HA-NBgAm-Xa from 1 to 4184 COMMENT CMV-mAX2m from 1 to 4915 COMMENT LAMP1_mGFP(34831) from 1 to 6015 COMMENT ApEinfo:methylated:1 FEATURES Location/Qualifiers …	LOCUS CT7_2Sca_Rab6a 6218 bp DNA circular 08-AUG-2021 DEFINITION LAMP1-mGFP Sequencing Result ORGANISM other sequences; artificial sequences; vectors. COMMENT CT7-2xSca-mBIG1 from 1 to 11078 COMMENT CT7-HA-NBgAm from 1 to 4235 COMMENT CMV-HA-NBgAm-Xa from 1 to 4184 COMMENT CMV-mAX2m from 1 to 4915 COMMENT LAMP1_mGFP(34831) from 1 to 6015 COMMENT ApEinfo:methylated:1 FEATURES Location/Qualifiers m…	LOCUS CT7_2xRb_hGM130 7202 bp DNA circular 30-OCT-2025 DEFINITION LAMP1-mGFP Sequencing Result ORGANISM other sequences; artificial sequences; vectors. COMMENT CT7-HA-NBgAm from 1 to 4235 COMMENT CMV-HA-NBgAm-Xa from 1 to 4184 COMMENT CMV-mAX2m from 1 to 4915 COMMENT LAMP1_mGFP(34831) from 1 to 6015 COMMENT ApEinfo:methylated:1 FEATURES Location/Qualifiers CDS 1570..3762 /locus_tag="GM130 human" …	LOCUS CT7_mARF1_LL_NBg 6314 bp DNA circular 30-OCT-2025 DEFINITION LAMP1-mGFP Sequencing Result ORGANISM other sequences; artificial sequences; vectors. COMMENT CT7-HA-NBgAm from 1 to 4235 COMMENT CMV-HA-NBgAm-Xa from 1 to 4184 COMMENT CMV-mAX2m from 1 to 4915 COMMENT LAMP1_mGFP(34831) from 1 to 6015 COMMENT ApEinfo:methylated:1 FEATURES Location/Qualifiers misc_feature 1386..1392 /locus_tag="ML"…	LOCUS CT7_mARF3_ML_NBg 6188 bp DNA circular 30-OCT-2025 DEFINITION LAMP1-mGFP Sequencing Result ORGANISM other sequences; artificial sequences; vectors. COMMENT CT7-HA-NBgAm from 1 to 4235 COMMENT CMV-HA-NBgAm-Xa from 1 to 4184 COMMENT CMV-mAX2m from 1 to 4915 COMMENT LAMP1_mGFP(34831) from 1 to 6015 COMMENT ApEinfo:methylated:1 FEATURES Location/Qualifiers misc_feature 1213..1266 /locus_tag="ML"…	LOCUS CT7_mARF1_LL_NBg 6338 bp DNA circular 30-OCT-2025 DEFINITION LAMP1-mGFP Sequencing Result ORGANISM other sequences; artificial sequences; vectors. COMMENT CT7-HA-NBgAm from 1 to 4235 COMMENT CMV-HA-NBgAm-Xa from 1 to 4184 COMMENT CMV-mAX2m from 1 to 4915 COMMENT LAMP1_mGFP(34831) from 1 to 6015 COMMENT ApEinfo:methylated:1 FEATURES Location/Qualifiers misc_feature 1386..1392 /locus_tag="ML"…	LOCUS New_DNA 6167 bp DNA circular 15-MAR-2023 DEFINITION LAMP1-mGFP Sequencing Result ORGANISM other sequences; artificial sequences; vectors. COMMENT CT7-HA-NBgA-2xNG from 1 to 5654 COMMENT CT7-HA-NBgAm from 1 to 4235 COMMENT CMV-HA-NBgAm-Xa from 1 to 4184 COMMENT CMV-mAX2m from 1 to 4915 COMMENT LAMP1_mGFP(34831) from 1 to 6015 COMMENT ApEinfo:methylated:1 FEATURES Location/Qualifiers source 2…	LOCUS New_DNA 6167 bp DNA circular 18-MAR-2023 DEFINITION LAMP1-mGFP Sequencing Result ORGANISM other sequences; artificial sequences; vectors. COMMENT CT7-HA-NBgA-2xNG from 1 to 5654 COMMENT CT7-HA-NBgAm from 1 to 4235 COMMENT CMV-HA-NBgAm-Xa from 1 to 4184 COMMENT CMV-mAX2m from 1 to 4915 COMMENT LAMP1_mGFP(34831) from 1 to 6015 COMMENT ApEinfo:methylated:1 FEATURES Location/Qualifiers source 2…	LOCUS CT7_HA_LL_NBgA_2 6350 bp DNA circular 30-OCT-2025 DEFINITION LAMP1-mGFP Sequencing Result ORGANISM other sequences; artificial sequences; vectors. COMMENT CT7-HA-NBgAm from 1 to 4235 COMMENT CMV-HA-NBgAm-Xa from 1 to 4184 COMMENT CMV-mAX2m from 1 to 4915 COMMENT LAMP1_mGFP(34831) from 1 to 6015 COMMENT ApEinfo:methylated:1 FEATURES Location/Qualifiers misc_feature 1386..1392 /locus_tag="ML"…	LOCUS CT7_HA_ML_NBgA_2 6224 bp DNA circular 30-OCT-2025 DEFINITION LAMP1-mGFP Sequencing Result ORGANISM other sequences; artificial sequences; vectors. COMMENT CT7-HA-NBgAm from 1 to 4235 COMMENT CMV-HA-NBgAm-Xa from 1 to 4184 COMMENT CMV-mAX2m from 1 to 4915 COMMENT LAMP1_mGFP(34831) from 1 to 6015 COMMENT ApEinfo:methylated:1 FEATURES Location/Qualifiers misc_feature 1213..1266 /locus_tag="ML"…	LOCUS New_DNA 6134 bp DNA circular 30-OCT-2025 DEFINITION LAMP1-mGFP Sequencing Result ORGANISM other sequences; artificial sequences; vectors. COMMENT CMV-2xRb-GM130 from 1 to 7802 COMMENT CMV-2xCv-GM130 from 1 to 7775 COMMENT CMV-mAX2m from 1 to 4915 COMMENT LAMP1_mGFP(34831) from 1 to 6015 COMMENT ApEinfo:methylated:1 FEATURES Location/Qualifiers promoter 17..569 /locus_tag="CMV_immearly_promo…	LOCUS CT7_mAP1m1_2xNG 6869 bp DNA circular 30-OCT-2025 DEFINITION LAMP1-mGFP Sequencing Result ORGANISM other sequences; artificial sequences; vectors. COMMENT CT7-HA-NBgAm from 1 to 4235 COMMENT CMV-HA-NBgAm-Xa from 1 to 4184 COMMENT CMV-mAX2m from 1 to 4915 COMMENT LAMP1_mGFP(34831) from 1 to 6015 COMMENT ApEinfo:methylated:1 FEATURES Location/Qualifiers misc_feature 72..359 /locus_tag="CAG_enh…	LOCUS CT7_HA_NBgA_2xNG 6893 bp DNA circular 30-OCT-2025 DEFINITION LAMP1-mGFP Sequencing Result ORGANISM other sequences; artificial sequences; vectors. COMMENT CT7-HA-NBgAm from 1 to 4235 COMMENT CMV-HA-NBgAm-Xa from 1 to 4184 COMMENT CMV-mAX2m from 1 to 4915 COMMENT LAMP1_mGFP(34831) from 1 to 6015 COMMENT ApEinfo:methylated:1 FEATURES Location/Qualifiers source 2746..3450 /organism="synthetic …	LOCUS CT7_mAP1m1_2xSca 6341 bp DNA circular 31-OCT-2025 DEFINITION LAMP1-mGFP Sequencing Result ORGANISM other sequences; artificial sequences; vectors. COMMENT CT7-HA-NBgAm from 1 to 4235 COMMENT CMV-HA-NBgAm-Xa from 1 to 4184 COMMENT CMV-mAX2m from 1 to 4915 COMMENT LAMP1_mGFP(34831) from 1 to 6015 COMMENT ApEinfo:methylated:1 FEATURES Location/Qualifiers misc_feature 72..359 /locus_tag="CAG_en…	LOCUS CT7_hSec13_2Sca 6563 bp DNA circular 03-APR-2025 DEFINITION LAMP1-mGFP Sequencing Result ORGANISM other sequences; artificial sequences; vectors. COMMENT CT7-Sca-NBgA-m from 1 to 4901 COMMENT CT7-HA-NBgAm from 1 to 4235 COMMENT CMV-HA-NBgAm-Xa from 1 to 4184 COMMENT CMV-mAX2m from 1 to 4915 COMMENT LAMP1_mGFP(34831) from 1 to 6015 COMMENT ApEinfo:methylated:1 FEATURES Location/Qualifiers mi…	LOCUS CMV_SP_zdk_2xNG_ 5925 bp ds-DNA circular 02-JUN-2020 DEFINITION LAMP1-mGFP Sequencing Result ORGANISM other sequences; artificial sequences; vectors. COMMENT CMV-SP-Zdk-2xCv-GPI from 1 to 5943 COMMENT CMV-mAX2m from 1 to 4915 COMMENT LAMP1_mGFP(34831) from 1 to 6015 COMMENT ApEinfo:methylated:1 FEATURES Location/Qualifiers source 899..1603 /organism="synthetic DNA construct" /mol_type="othe…	LOCUS CMV_SP_zdk_2xNG_ 5925 bp ds-DNA circular 02-JUN-2020 DEFINITION LAMP1-mGFP Sequencing Result ORGANISM other sequences; artificial sequences; vectors. COMMENT CMV-SP-Zdk-2xCv-GPI from 1 to 5943 COMMENT CMV-mAX2m from 1 to 4915 COMMENT LAMP1_mGFP(34831) from 1 to 6015 COMMENT ApEinfo:methylated:1 FEATURES Location/Qualifiers source 899..1603 /organism="synthetic DNA construct" /mol_type="othe…	LOCUS Str_KDEL_2xNG_VS 6969 bp DNA circular 30-OCT-2025 DEFINITION Str-KDEL_SBP-EGFP-GPI ORGANISM other sequences; artificial sequences; vectors. COMMENT Str_KDEL_SBP_EGFP_GPI from 1 to 6047 COMMENT ApEinfo:methylated:1 FEATURES Location/Qualifiers terminator 4482..4710 /translation=MLYMCLVEVKKTSRPPEPRGRGFPLKNTMISLPQPGRRAMYRMQL LSCIALSLALVTNSDEKTTGWRGGHVVEGLAGELEQLRARLEHHPQGQREPPAGVSKG EELFTGVVPI…	LOCUS Str_KDEL_2xSca_V 8367 bp DNA circular 30-OCT-2025 DEFINITION Str-KDEL_SBP-EGFP-GPI ORGANISM other sequences; artificial sequences; vectors. COMMENT Str_KDEL_SBP_EGFP_GPI from 1 to 6047 COMMENT ApEinfo:methylated:1 FEATURES Location/Qualifiers terminator 5880..6108 /translation=MLYMCLVEVKKTSRPPEPRGRGFPLKNTMISLPQPGRRAMYRMQL LSCIALSLALVTNSDEKTTGWRGGHVVEGLAGELEQLRARLEHHPQGQREPPAGVSKG EELFTGVVPI…	LOCUS Str_KDEL_TNF_2xN 7570 bp DNA circular 30-OCT-2025 DEFINITION Str-KDEL_SBP-EGFP-GPI ORGANISM other sequences; artificial sequences; vectors. COMMENT Str_KDEL-TfR-SBP-2xSca from 1 to 9131 COMMENT Str_KDEL_SBP_EGFP_GPI from 1 to 6047 COMMENT ApEinfo:methylated:1 FEATURES Location/Qualifiers terminator 5083..5311 /translation=MLYMCLVEVKKTSRPPEPRGRGFPLKNTMISLPQPGRRAMYRMQL LSCIALSLALVTNSDEKTTGWRG…	LOCUS Str_KDEL_2xNG_VS 8346 bp DNA circular 30-OCT-2025 DEFINITION Str-KDEL_SBP-EGFP-GPI ORGANISM other sequences; artificial sequences; vectors. COMMENT Str_KDEL_SBP_EGFP_GPI from 1 to 6047 COMMENT ApEinfo:methylated:1 FEATURES Location/Qualifiers terminator 5859..6087 /translation=MLYMCLVEVKKTSRPPEPRGRGFPLKNTMISLPQPGRRAMYRMQL LSCIALSLALVTNSDEKTTGWRGGHVVEGLAGELEQLRARLEHHPQGQREPPAGVSKG EELFTGVVPI…	LOCUS CT7_Rush_2xSca_G 8211 bp DNA circular 30-OCT-2025 DEFINITION LAMP1-mGFP Sequencing Result ORGANISM other sequences; artificial sequences; vectors. COMMENT CT7-Rush-2Cv-7HT-GPI from 1 to 13950 COMMENT CT7-HA-7HT-m from 1 to 10604 COMMENT CMV-HA-NBgAm-Xa from 1 to 4184 COMMENT CMV-mAX2m from 1 to 4915 COMMENT LAMP1_mGFP(34831) from 1 to 6015 COMMENT ApEinfo:methylated:1 FEATURES Location/Qual…	LOCUS Str_KDEL_SP_SBP_ 6979 bp DNA circular 30-OCT-2025 DEFINITION Str-KDEL_SBP-EGFP-GPI ORGANISM other sequences; artificial sequences; vectors. COMMENT Str_KDEL_SBP_EGFP_GPI from 1 to 6047 COMMENT ApEinfo:methylated:1 FEATURES Location/Qualifiers terminator 4492..4720 /translation=MLYMCLVEVKKTSRPPEPRGRGFPLKNTMISLPQPGRRAMYRMQL LSCIALSLALVTNSDEKTTGWRGGHVVEGLAGELEQLRARLEHHPQGQREPPAGVSKG EELFTGVVPI…	LOCUS CT7_Rush_HT7_GPI 7014 bp DNA circular 07-OCT-2025 DEFINITION LAMP1-mGFP Sequencing Result ORGANISM other sequences; artificial sequences; vectors. COMMENT CT7-Rush-2Cv-7HT-GPI from 1 to 13950 COMMENT CT7-HA-7HT-m from 1 to 10604 COMMENT CMV-HA-NBgAm-Xa from 1 to 4184 COMMENT CMV-mAX2m from 1 to 4915 COMMENT LAMP1_mGFP(34831) from 1 to 6015 COMMENT ApEinfo:methylated:1 FEATURES Location/Qual…	LOCUS CT7_Rush_SG_GPI 7542 bp DNA circular 30-OCT-2025 DEFINITION LAMP1-mGFP Sequencing Result ORGANISM other sequences; artificial sequences; vectors. COMMENT CT7-Rush-2Cv-7HT-GPI from 1 to 13950 COMMENT CT7-HA-7HT-m from 1 to 10604 COMMENT CMV-HA-NBgAm-Xa from 1 to 4184 COMMENT CMV-mAX2m from 1 to 4915 COMMENT LAMP1_mGFP(34831) from 1 to 6015 COMMENT ApEinfo:methylated:1 FEATURES Location/Quali…	LOCUS CT7_HA_ML_NBgA_2 5837 bp DNA circular 30-OCT-2025 DEFINITION LAMP1-mGFP Sequencing Result ORGANISM other sequences; artificial sequences; vectors. COMMENT CT7-HA-NBgAm from 1 to 4235 COMMENT CMV-HA-NBgAm-Xa from 1 to 4184 COMMENT CMV-mAX2m from 1 to 4915 COMMENT LAMP1_mGFP(34831) from 1 to 6015 COMMENT ApEinfo:methylated:1 FEATURES Location/Qualifiers misc_feature 640..663 /locus_tag="HA" /…	LOCUS CT7_HA_ML_NBgA_2 5837 bp DNA circular 30-OCT-2025 DEFINITION LAMP1-mGFP Sequencing Result ORGANISM other sequences; artificial sequences; vectors. COMMENT CT7-HA-NBgAm from 1 to 4235 COMMENT CMV-HA-NBgAm-Xa from 1 to 4184 COMMENT CMV-mAX2m from 1 to 4915 COMMENT LAMP1_mGFP(34831) from 1 to 6015 COMMENT ApEinfo:methylated:1 FEATURES Location/Qualifiers misc_feature 640..663 /locus_tag="HA" /…	LOCUS CT7_HA_ML_NBgA_2 5711 bp DNA circular 29-MAR-2022 DEFINITION LAMP1-mGFP Sequencing Result ORGANISM other sequences; artificial sequences; vectors. COMMENT CT7-HA-NBgAm from 1 to 4235 COMMENT CMV-HA-NBgAm-Xa from 1 to 4184 COMMENT CMV-mAX2m from 1 to 4915 COMMENT LAMP1_mGFP(34831) from 1 to 6015 COMMENT ApEinfo:methylated:1 FEATURES Location/Qualifiers misc_feature 640..663 /locus_tag="HA" /…	LOCUS CT7_Rush_SG_GPI 7542 bp DNA circular 30-OCT-2025 DEFINITION LAMP1-mGFP Sequencing Result ORGANISM other sequences; artificial sequences; vectors. COMMENT CT7-Rush-2Cv-7HT-GPI from 1 to 13950 COMMENT CT7-HA-7HT-m from 1 to 10604 COMMENT CMV-HA-NBgAm-Xa from 1 to 4184 COMMENT CMV-mAX2m from 1 to 4915 COMMENT LAMP1_mGFP(34831) from 1 to 6015 COMMENT ApEinfo:methylated:1 FEATURES Location/Quali…	LOCUS CMV_TNF_Zdk_2xNG 6456 bp DNA circular 30-OCT-2025 DEFINITION LAMP1-mGFP Sequencing Result ORGANISM other sequences; artificial sequences; vectors. COMMENT CMV-HA-NBgAm-Xa from 1 to 4184 COMMENT CMV-mAX2m from 1 to 4915 COMMENT LAMP1_mGFP(34831) from 1 to 6015 COMMENT ApEinfo:methylated:1 FEATURES Location/Qualifiers promoter 17..569 /locus_tag="CMV_immearly_promoter" /label="CMV_immearly_pr…	LOCUS CMV_TNF_Zdk_2xCv 6531 bp ds-DNA circular 18-JUN-2020 DEFINITION LAMP1-mGFP Sequencing Result ORGANISM other sequences; artificial sequences; vectors. COMMENT CMV-HA-NBgAm-Xa from 1 to 4184 COMMENT CMV-mAX2m from 1 to 4915 COMMENT LAMP1_mGFP(34831) from 1 to 6015 COMMENT ApEinfo:methylated:1 FEATURES Location/Qualifiers promoter 17..569 /label=CMV_immearly_promoter /ApEinfo_fwdcolor=#ccffed …	LOCUS CT7_HA_NBgA_2xNG 5654 bp ds-DNA circular 27-JUL-2020 DEFINITION LAMP1-mGFP Sequencing Result ORGANISM other sequences; artificial sequences; vectors. COMMENT CT7-HA-NBgAm from 1 to 4235 COMMENT CMV-HA-NBgAm-Xa from 1 to 4184 COMMENT CMV-mAX2m from 1 to 4915 COMMENT LAMP1_mGFP(34831) from 1 to 6015 COMMENT ApEinfo:methylated:1 FEATURES Location/Qualifiers misc_feature 640..663 /label=HA /ApE…	LOCUS CT7_HA_NBgA_2xSc 5630 bp DNA circular 19-MAR-2022 DEFINITION LAMP1-mGFP Sequencing Result ORGANISM other sequences; artificial sequences; vectors. COMMENT CT7-HA-NBgAm from 1 to 4235 COMMENT CMV-HA-NBgAm-Xa from 1 to 4184 COMMENT CMV-mAX2m from 1 to 4915 COMMENT LAMP1_mGFP(34831) from 1 to 6015 COMMENT ApEinfo:methylated:1 FEATURES Location/Qualifiers misc_feature 640..663 /locus_tag="HA" /…	LOCUS CMV_SP_SBP_GFP_A 5820 bp DNA circular 30-OCT-2025 DEFINITION LAMP1-mGFP Sequencing Result ORGANISM other sequences; artificial sequences; vectors. COMMENT CMV-SP-SBP-2xCv-Furin_YAC from 1 to 6561 COMMENT CMV-mAX2m from 1 to 4915 COMMENT LAMP1_mGFP(34831) from 1 to 6015 COMMENT ApEinfo:methylated:0 FEATURES Location/Qualifiers promoter 17..569 /locus_tag="CMV_immearly_promoter" /label="CMV_i…	LOCUS CMV_SP_SBP_GFP_A 5851 bp DNA circular 30-OCT-2025 DEFINITION LAMP1-mGFP Sequencing Result ORGANISM other sequences; artificial sequences; vectors. COMMENT CMV-SP-SBP-2xCv-Furin_YAC from 1 to 6561 COMMENT CMV-mAX2m from 1 to 4915 COMMENT LAMP1_mGFP(34831) from 1 to 6015 COMMENT ApEinfo:methylated:0 FEATURES Location/Qualifiers promoter 17..569 /locus_tag="CMV_immearly_promoter" /label="CMV_i…	LOCUS CT7_2xSca_NBgA_m 5645 bp DNA circular 08-APR-2023 DEFINITION LAMP1-mGFP Sequencing Result ORGANISM other sequences; artificial sequences; vectors. COMMENT CT7-HA-NBgAm from 1 to 4235 COMMENT CMV-HA-NBgAm-Xa from 1 to 4184 COMMENT CMV-mAX2m from 1 to 4915 COMMENT LAMP1_mGFP(34831) from 1 to 6015 COMMENT ApEinfo:methylated:1 FEATURES Location/Qualifiers misc_feature 72..359 /locus_tag="CAG_en…	LOCUS CMV_SP_SBP_2xCv_ 5292 bp DNA circular 30-OCT-2025 DEFINITION LAMP1-mGFP Sequencing Result ORGANISM other sequences; artificial sequences; vectors. COMMENT CMV-mAX2m from 1 to 4915 COMMENT LAMP1_mGFP(34831) from 1 to 6015 COMMENT ApEinfo:methylated:1 FEATURES Location/Qualifiers promoter 17..569 /locus_tag="CMV_immearly_promoter" /label="CMV_immearly_promoter" /ApEinfo_label="CMV_immearly_pr…	LOCUS CT7_HA_HTbase_m 5150 bp DNA circular 30-OCT-2025 DEFINITION LAMP1-mGFP Sequencing Result ORGANISM other sequences; artificial sequences; vectors. COMMENT CMV-HA-NBgAm-Xa from 1 to 4184 COMMENT CMV-mAX2m from 1 to 4915 COMMENT LAMP1_mGFP(34831) from 1 to 6015 COMMENT ApEinfo:methylated:1 FEATURES Location/Qualifiers misc_feature 640..663 /locus_tag="HA" /label="HA" /ApEinfo_label="HA" /ApEin…	LOCUS CT7_HA_NBgAm 4235 bp ds-DNA circular 01-JUN-2021 DEFINITION LAMP1-mGFP Sequencing Result ORGANISM other sequences; artificial sequences; vectors. COMMENT CMV-HA-NBgAm-Xa from 1 to 4184 COMMENT CMV-mAX2m from 1 to 4915 COMMENT LAMP1_mGFP(34831) from 1 to 6015 COMMENT ApEinfo:methylated:1 FEATURES Location/Qualifiers misc_feature 640..663 /label=HA /ApEinfo_fwdcolor=#ffcc66 /ApEinfo_revcolor=…	LOCUS CMV_SP_SBP_mAX2_ 5794 bp ds-DNA circular 11-APR-2020 DEFINITION LAMP1-mGFP Sequencing Result ORGANISM other sequences; artificial sequences; vectors. COMMENT CMV-SP-SBP-2xCv-Furin_YAC from 1 to 6561 COMMENT CMV-mAX2m from 1 to 4915 COMMENT LAMP1_mGFP(34831) from 1 to 6015 COMMENT ApEinfo:methylated:0 FEATURES Location/Qualifiers promoter 17..569 /label=CMV_immearly_promoter /ApEinfo_fwdcolo…
[truncated: 9 more columns]

## Sheet: RT
	GBF1-wt	GBF1-M832L	dsDNA Repair Template
	Exon 17-19	Exon 17-19
GenBank fromat	LOCUS New_DNA 1687 bp DNA linear 31-OCT-2025 COMMENT GBF1_hs_genomic from 141274 to 142960 COMMENT >gi|568815588|ref|NC_000010.11|:102224887-102403508 Homo sapiens chromosome 10, GRCh38.p7 Primary Assembly COMMENT ApEinfo:methylated:0 FEATURES Location/Qualifiers CDS 926..1051 /locus_tag="exon18_GBF1" /label="exon18_GBF1" /ApEinfo_label="exon18_GBF1" /ApEinfo_fwdcolor="#99ccff" /ApEinfo_revcolor=…	LOCUS New_DNA 842 bp DNA linear 31-OCT-2025 COMMENT GBF1_Sec7_BFA-resistant from 764 to 1894 COMMENT GBF1_hs_genomic from 141567 to 142652 COMMENT >gi|568815588|ref|NC_000010.11|:102224887-102403508 Homo sapiens chromosome 10, GRCh38.p7 Primary Assembly COMMENT ApEinfo:methylated:0 FEATURES Location/Qualifiers misc_feature 163..662 /locus_tag="Repair template" /label="Repair template" /ApEinfo_la…	LOCUS New_DNA 500 bp DNA linear 31-OCT-2025 COMMENT GBF1_Sec7_BFA-resistant from 926 to 1425 COMMENT GBF1_hs_genomic from 141567 to 142652 COMMENT >gi|568815588|ref|NC_000010.11|:102224887-102403508 Homo sapiens chromosome 10, GRCh38.p7 Primary Assembly COMMENT ApEinfo:methylated:0 FEATURES Location/Qualifiers misc_feature 1..500 /locus_tag="Repair template" /label="Repair template" /ApEinfo_labe…
